# Supplementary material for: How Effective Is Environmental Protection in Ensuring the Vitality of Wild Orchid Species?
Source: Preprints.org preprint supplement (doi:10.20944/preprints202401.0191.v1), 2024-01-03
Supplement: Supplementary file 1 [file supplementary]

Supplementary file S1 - ANOVAs of the risk categories (1: absent; 2: weak; 3: moderate; 4: high). The asterisks indicate significant (*p* < 0.05) differences between protected (P) and non-protected (NP) sites.

| **Species** | **Protection** | **Mowing** | **Waste** | **Herbivory** | **IAS** |
| --- | --- | --- | --- | --- | --- |
| *O. sphegodes* | P | 3.00±0.58 | 2.00±0.58 | 1.67±0.67 | 2.33±0.67 |
|  | NP | 3.00±0.58 | 1.33±0.33 | 2.00±0.58 | 3.33±0.58 |
| *A. morio* | P | 1.67±0.67 | 1.67±0.67 | 1.67±0.67 | 2.33±0.67 |
|  | NP | 2.33±0.89 | 2.67±0.89 | 2.67±0.67 | 3.33±0.67 |
| *A. pyramidalis* | P | 2.00±1.00 | 1.67±0.67 | 1.33±0.33 | 1.67±0.33 |
|  | NP | 1.67±0.67 | 2.33±0.67 | 1.33±0.33 | 2.33±0.66 |
| *A. coriophora* | P | 2.67±0.89 | 2.67±0.89 | 1.00±0.00 | 2.00±0.58 |
|  | NP | 2.75±0.75 | 2.75±0.48 | 2.00±0.70* | 4.00±0.00* |
